# Supplementary material for: High-dimensional immune profiling identifies a biomarker to monitor dimethyl fumarate response in multiple sclerosis
Source: PubMed Central journal article supplement — Proc Natl Acad Sci U S A. 2022 Jul 26;119(31):e2205042119. doi: 10.1073/pnas.2205042119 (PMC9351505; doi:10.1073/pnas.2205042119), 2022-07-26
Supplement: pnas.2205042119.sapp.pdf [file pnas.2205042119.sapp.pdf]

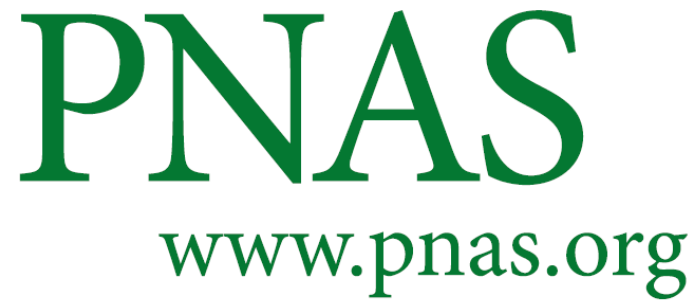

**Supplementary Information for**

High-dimensional immune profile elucidates response to dimethyl fumarate in multiple sclerosis

Martin Diebold, Edoardo Galli, Andreas Kopf, Nicholas Sanderson, Ilaria Callegari, Pascal Benkert, Nicolás Gonzalo Núñez, Florian Ingelfinger, Stefan Herms, Sven Cichon, Ludwig Kappos, Jens Kuhle, Burkhard Becher, Manfred Claassen, Tobias Derfuss

Tobias Derfuss

Email: [tobias.derfuss@usb.ch](mailto:tobias.derfuss@usb.ch)

**This PDF file includes:**

Figures S1 to S7  
Tables S1 to S6

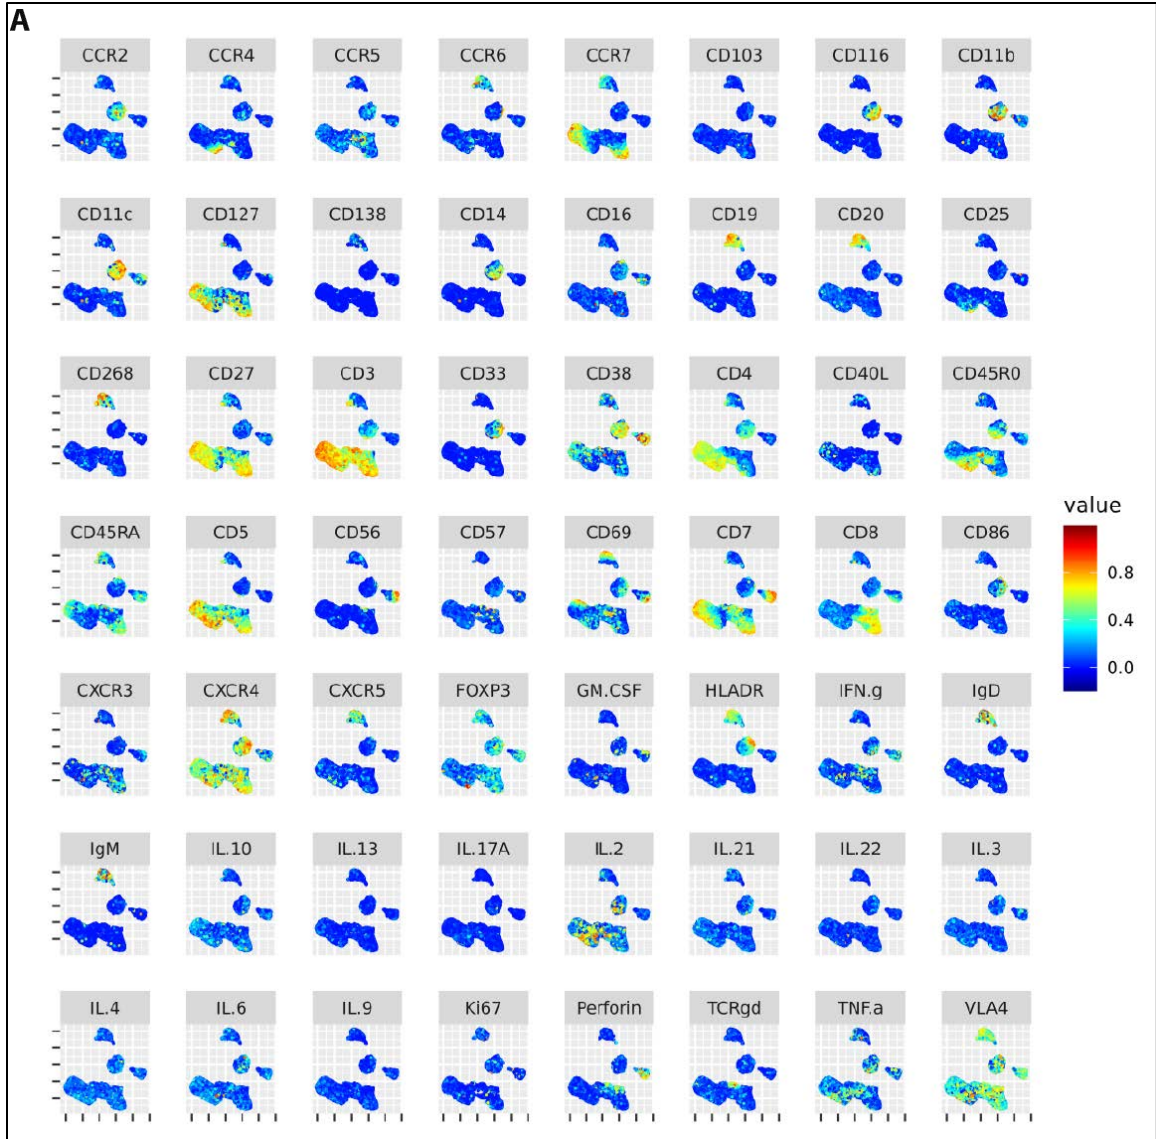

**Fig. S1. Expression of mass cytometry marker in the multipanel UMAP. (A)** Expression for each marker in the combined multipanel UMAP containing all PBMC by heatmap.

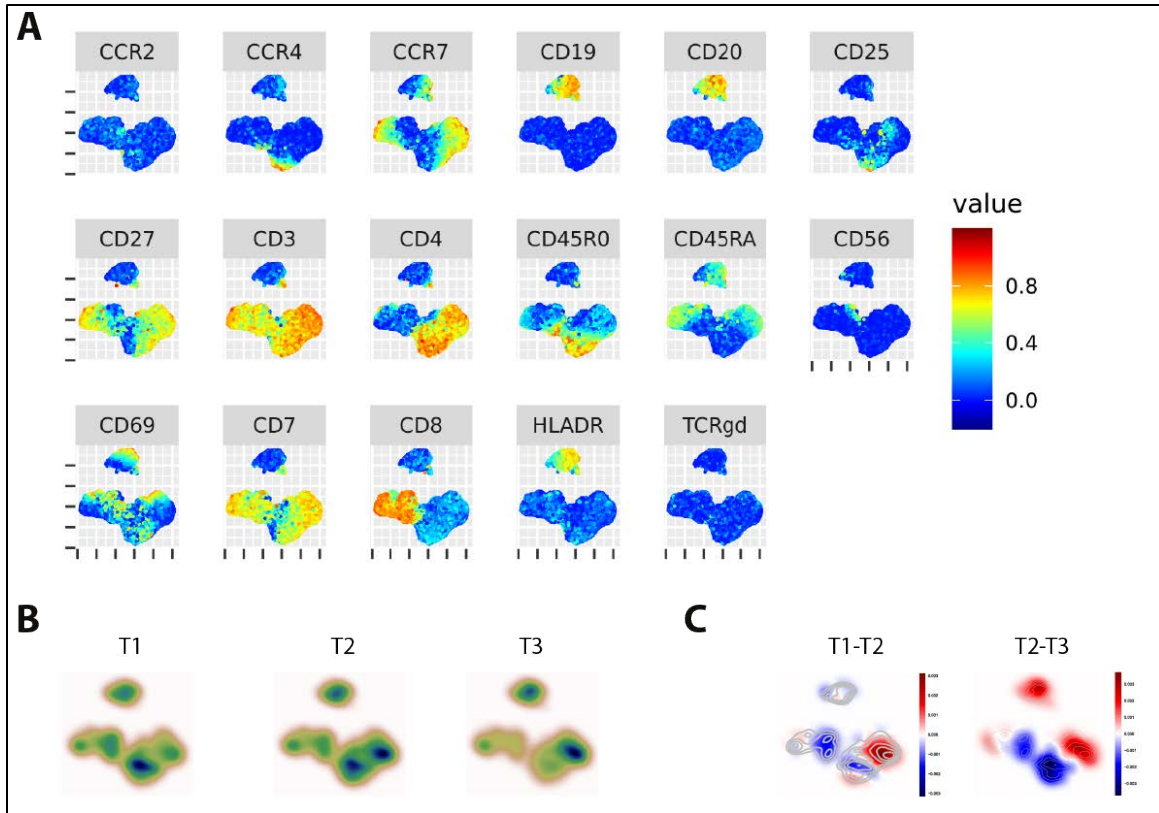

**Fig. S2. Longitudinal density changes in the multipanel T and B cell UMAP.** (A) Expression for each of the overlapping markers (between stimulation and conventional panel) in the reduced multipanel UMAP containing all B cells, Th and Tc cells by heatmap. (B) Cell density within the UMAP representation was computed via a Gaussian kernel density estimation for each timepoint T1 and T3. (C) The change of density within the UMAP representation was computed for change between T1 vs. T2 and T2 vs. T3, respectively.

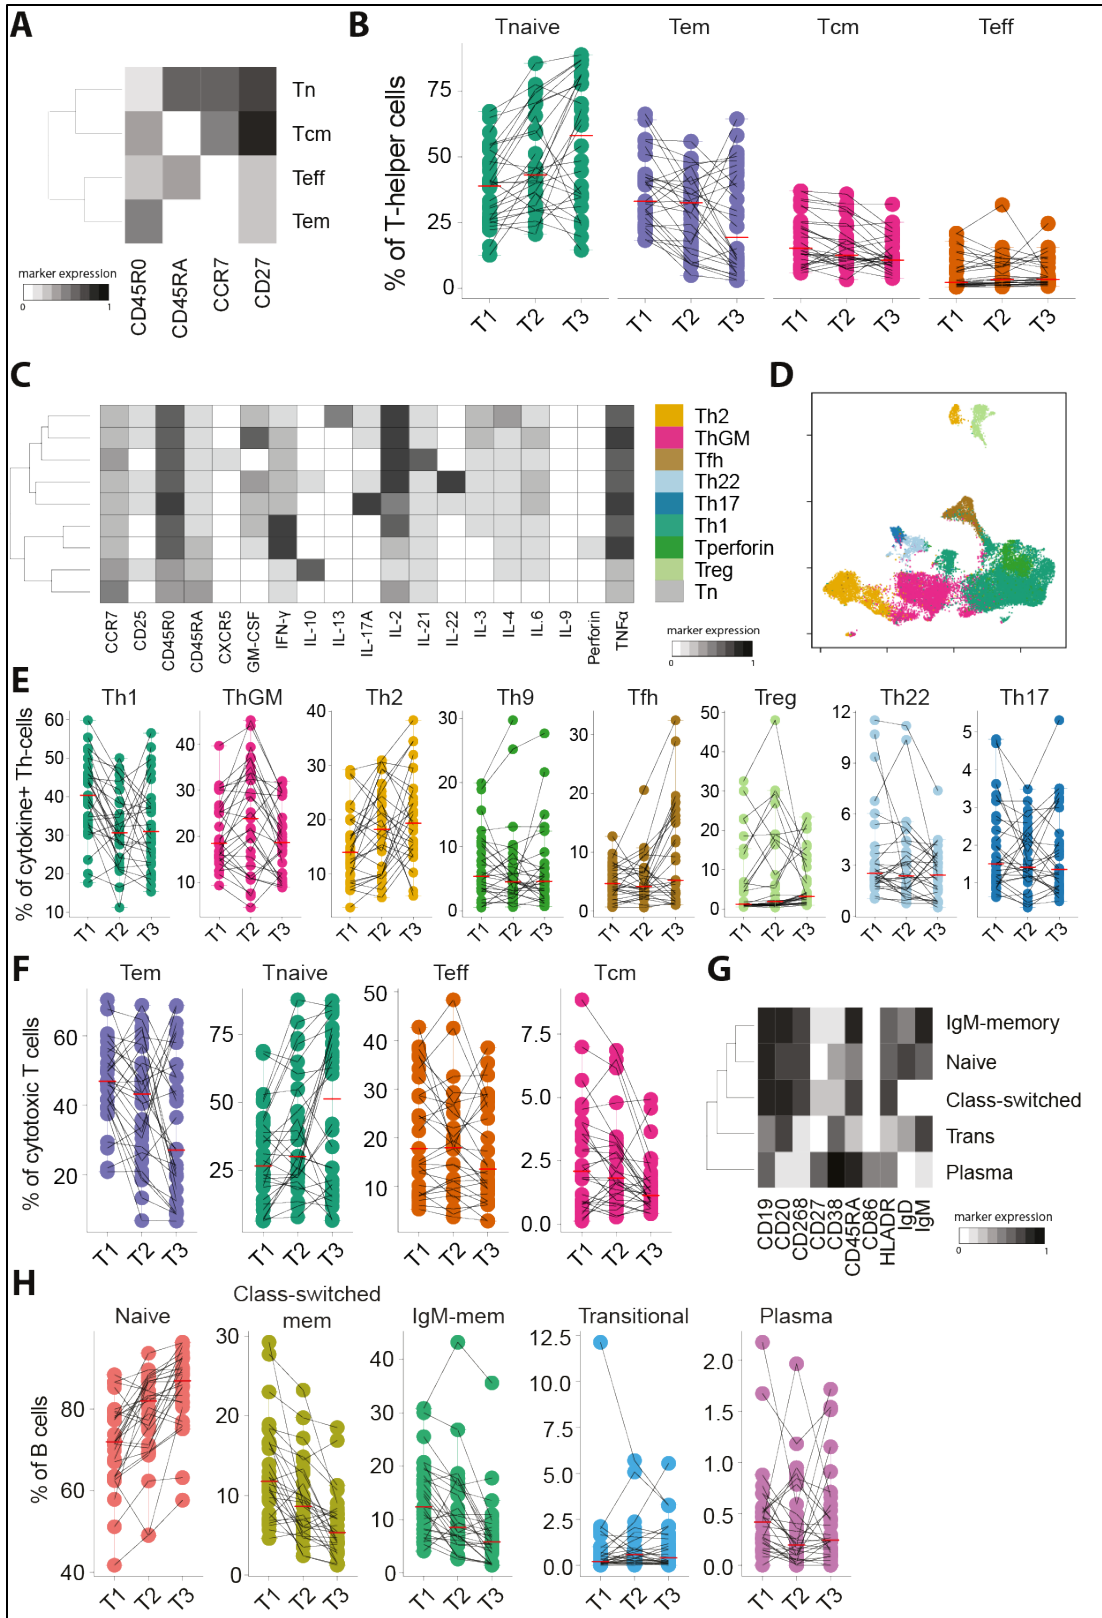

**Fig. S3. Longitudinal changes of T and B cell subsets.** (A) Th cells from MS patients were subdivided into naïve, effector, effector memory and central memory cells based on FlowSOM-

defined nodes. Mean population expression levels of the indicated differentiation markers. (B) Frequencies of Th subsets in Th cells. (C) FlowSOM was used to identify Th cell subsets based on their cytokine production profile. Clusters were manually annotated based on this profile. Shown are mean expression of surface and cytokine markers by the respective Th cell subsets. (D) UMAP representation of Th subsets with overlaid color code as categorized by FlowSOM-defined clusters. (E) Frequencies of Th subsets at different timepoints. A red horizontal line represents the median. Every point represents one individual sampling and each line connects the baseline and follow-up samples of individual patients. (F) Frequencies of Th subsets in cytotoxic cells. (G) B cells from MS patients were subdivided into naïve, class switched-memory, IgM-memory, transitional and plasma cells based on FlowSOM-defined nodes. Mean population expression levels of the indicated differentiation markers. (H) Frequencies of B subsets at all three timepoints.

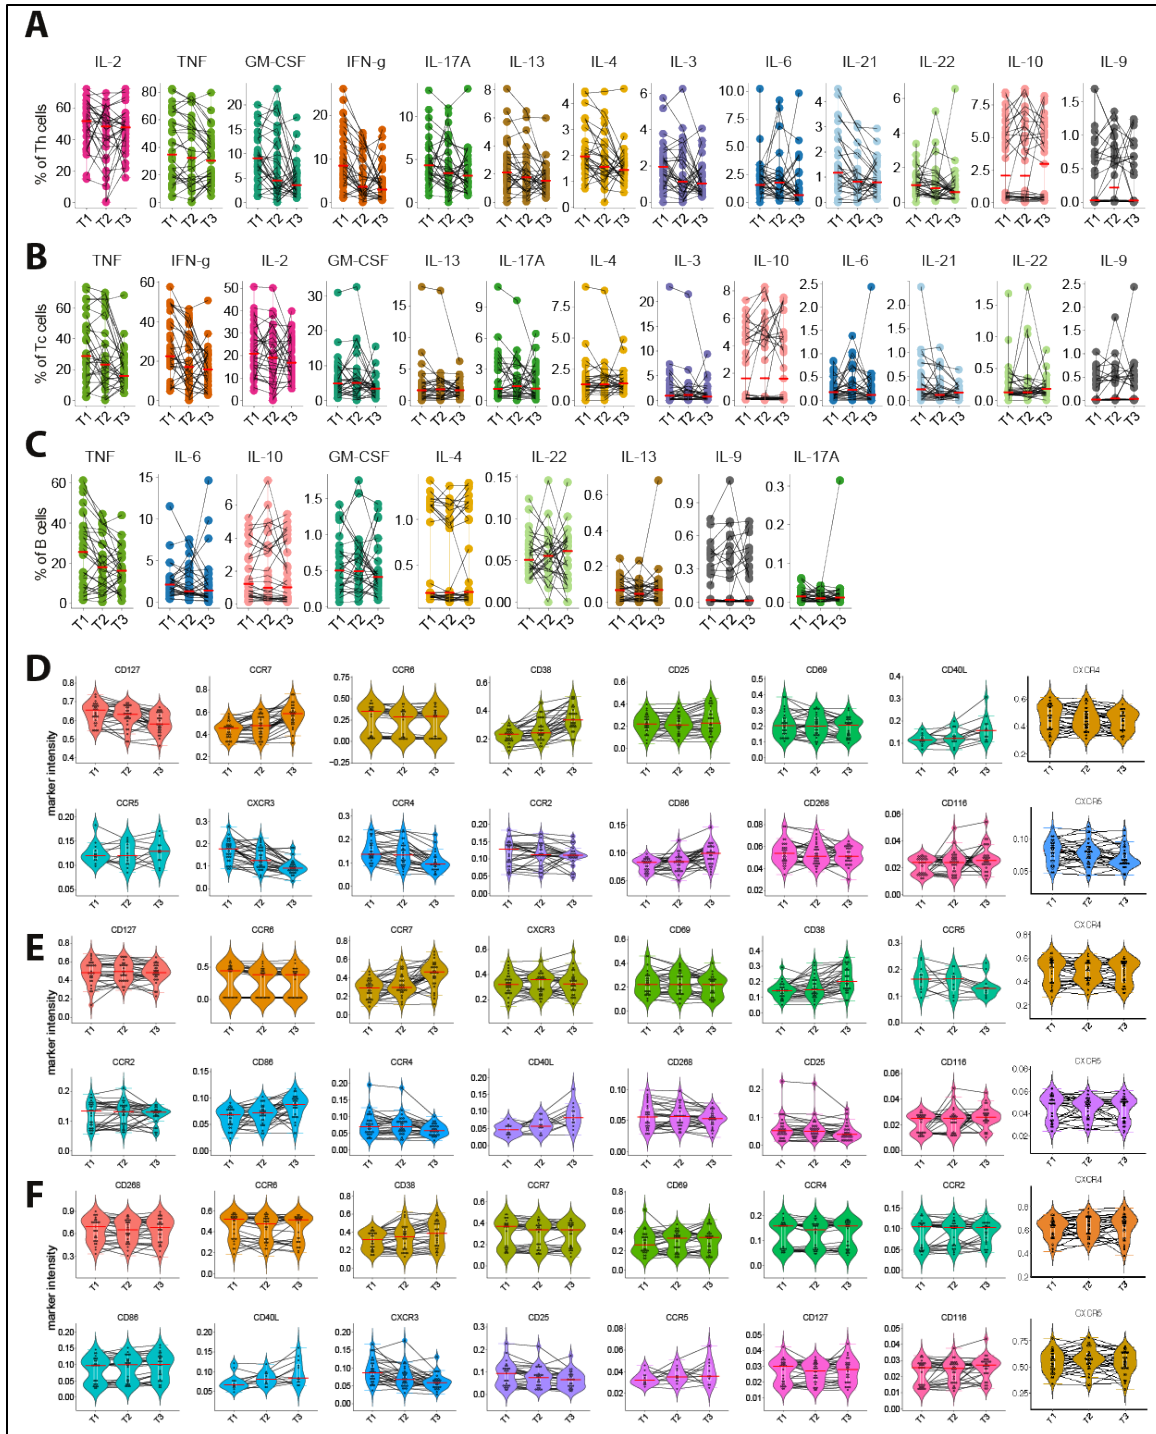

**Fig S4. Longitudinal changes of cytokine and cytokine receptor expression in T and B cells.** (A) Frequencies of cytokines in Th cells. (B) Frequencies of cytokines in Tc cells. (C) Frequencies of cytokines in B cells. (D) Intensity of cytokine/chemokine receptors in Th cells. (E) Intensity of cytokine/chemokine receptors in Tc cells. (F) Intensity of cytokine/chemokine receptors in B cells.



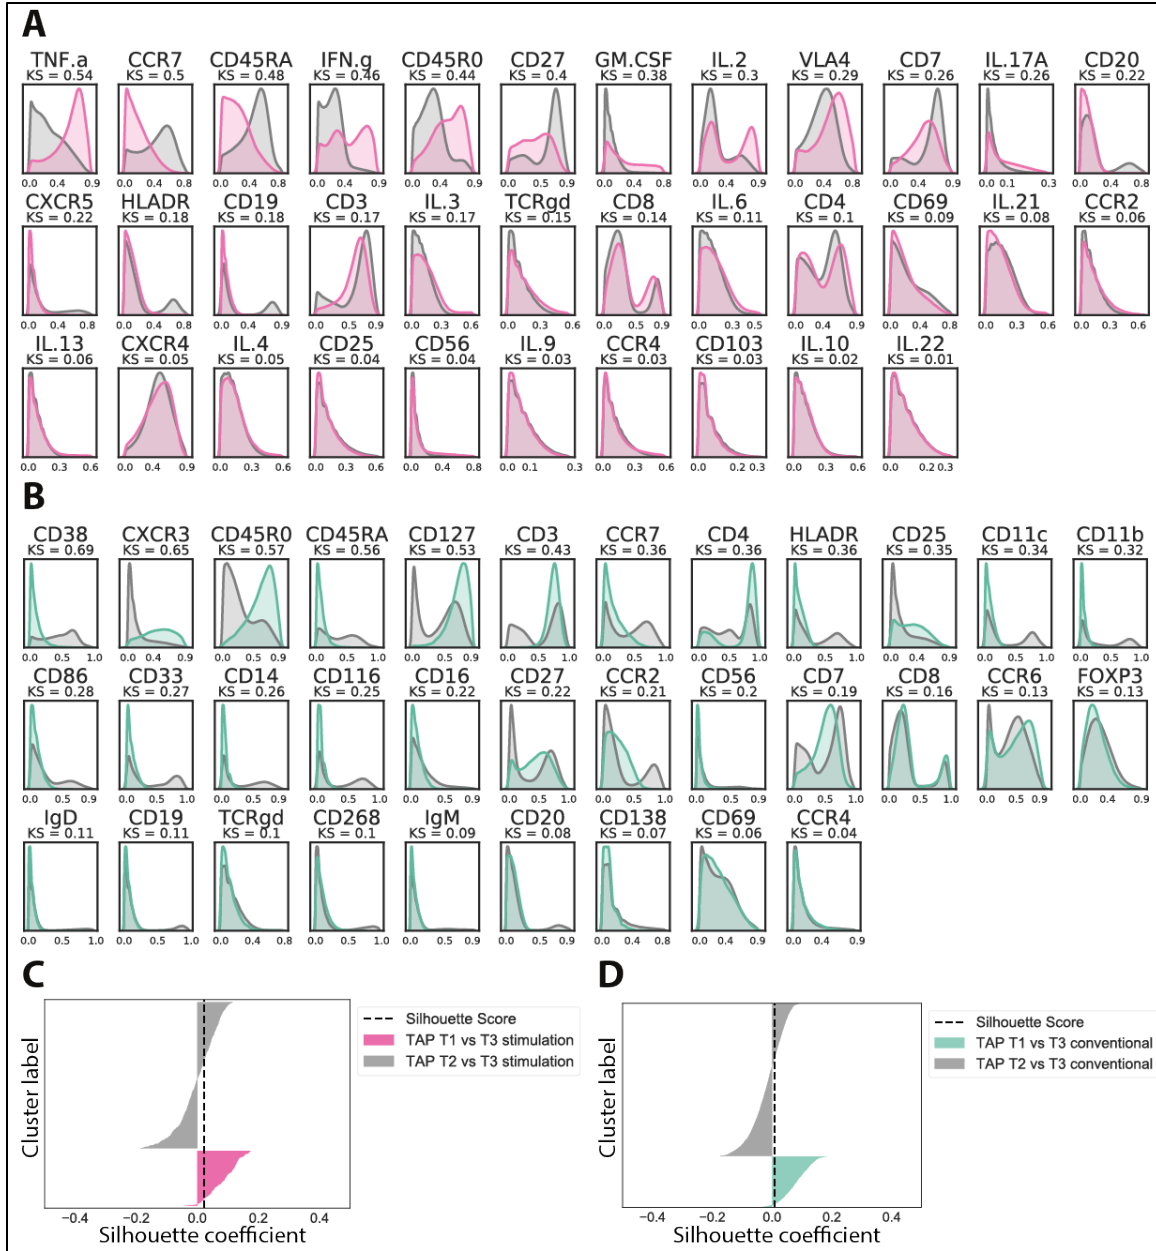

**Fig. S5. Details of therapy associated phenotype CellCNN analysis determined the core immune features between T 1 vs T 3 and T 2 vs T 3 from our patient's cohort, termed as therapy associated phenotype (TAP).** (A) Expression patterns of all markers from the stimulation panel between the treatment associated phenotype and the reference cell population for the stimulated panel Markers are ordered by their rank in Kolmogorov Smirnov test. (B) Expression patterns of all markers from the conventional panel between the treatment associated phenotype and the reference cell population for the stimulated panel Markers are ordered by their rank in Kolmogorov Smirnov test (C) The overlap between both cell filters identified for comparison T 1 vs T 3 and T 2 vs T 3 in the stimulation panel is estimated using the silhouette analysis. The black dashed line represents the silhouette score. (D) The overlap between both cell filters identified for comparison T 1 vs T 3 and T 2 vs T 3 in the conventional panel is estimated using the silhouette analysis. The black dashed line represents the silhouette score.

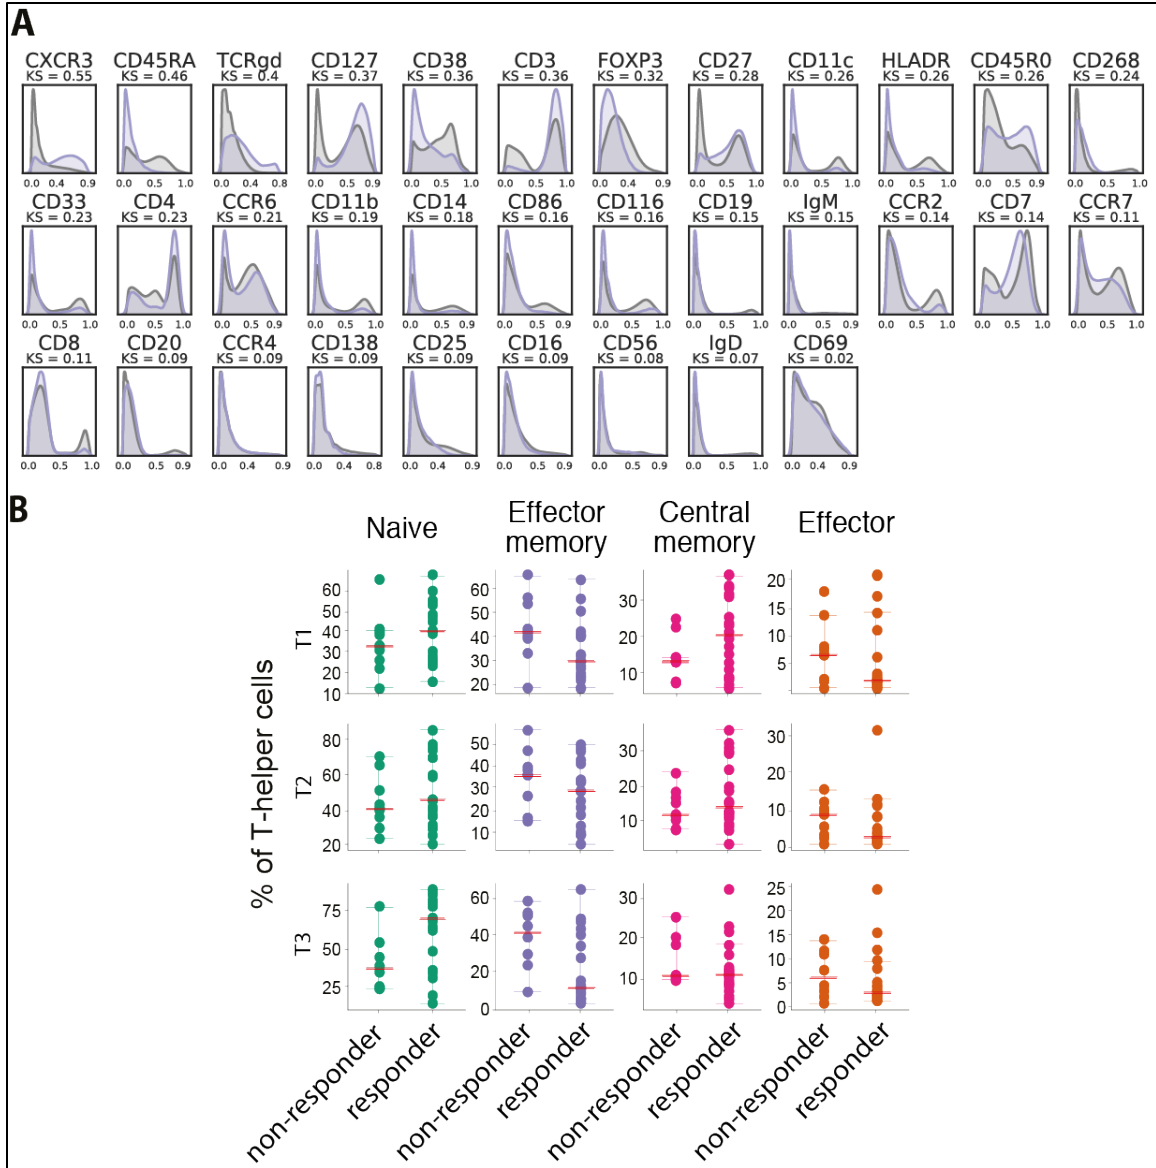

**Fig. S6. Details of response associated phenotype.** (A) Expression patterns of all markers between the response associated phenotype and the reference cell population for the stimulated panel. Markers are ordered by their rank in Kolmogorov Smirnov test. (B) Relative frequency of Th cell subsets at timepoints T1 - T3 between patients with/without signs of disease activity during the follow up period.



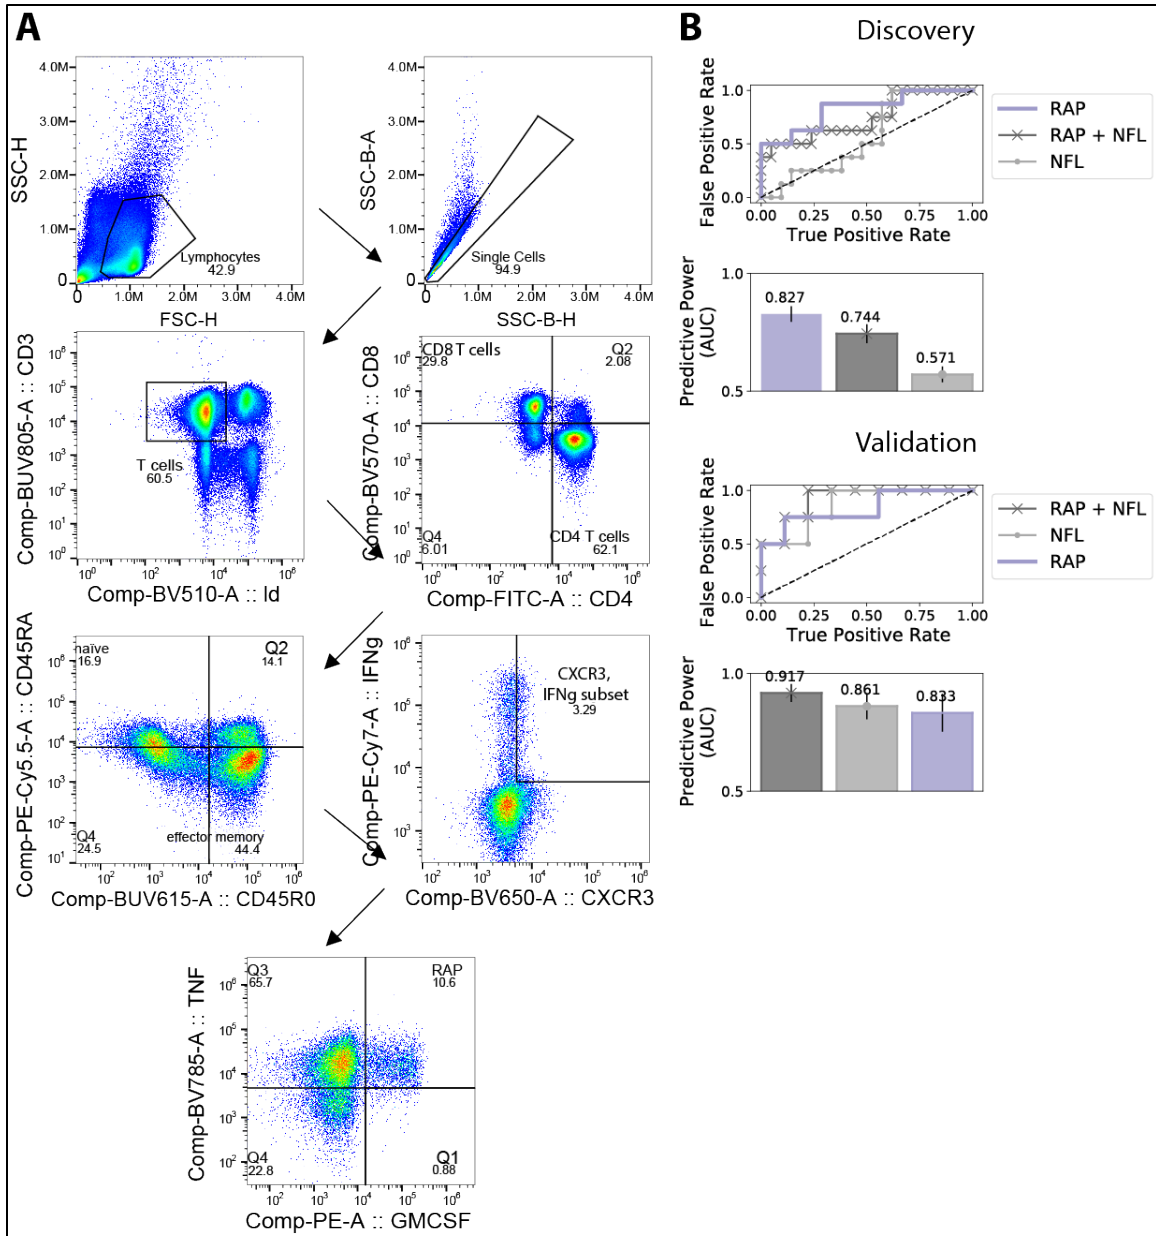

**Fig. S7. Details of validation cohorts.** (A) Gating strategy for the response associated immune phenotype (in flow cytometry samples). (B) ROC curve depicting the accuracy of predicting disease activity at T3 by RAP frequency at T3 and Nfl z-scores at T3 and by combining the two markers (RAP z-score, Nfl z-score). Bars illustrate the predictive accuracy and standard deviation at intragroup cross-validation.

| Patient ID                                | overall summary | mean responder | mean non-responder | p-value | 4031-6181  | 4031-6188  | 4031-5558  | 4031-6203  | 4031-5781    | 4031-6215, 2/4031-6220 | 4031-6232    | 4031-6212          | 4031-6206  | 4031-6275  | 4031-6276  | 4031-5611  | 4031-5687  | 4031-6308    | 4031-5392    | 4031-6335    | 4031-6354    | 4031-6374         | 4031-6377  | 4031-5670  | 4031-6393  | 4031-6422  | 4031-6271          | 4031-6273  | 4031-6248         | 4031-6289    | 4031-6205    | 4031-6327         | 4031-5622  | 4031-6390  |            |   |
|-------------------------------------------|-----------------|----------------|--------------------|---------|------------|------------|------------|------------|--------------|------------------------|--------------|--------------------|------------|------------|------------|------------|------------|--------------|--------------|--------------|--------------|-------------------|------------|------------|------------|------------|--------------------|------------|-------------------|--------------|--------------|-------------------|------------|------------|------------|---|
| <b>BI Characteristics</b>                 |                 |                |                    |         |            |            |            |            |              |                        |              |                    |            |            |            |            |            |              |              |              |              |                   |            |            |            |            |                    |            |                   |              |              |                   |            |            |            |   |
| sex (female = 1, male =2)                 | 17.14           | 14.9           | 3.5                | 0.2602  | 2          | 2          | 1          | 1          | 1            | 2                      | 1            | 1                  | 1          | 2          | 1          | 2          | 1          | 2            | 1            | 2            | 2            | 2                 | 1          | 1          | 1          | 2          | 2                  | 2          | 1                 | 2            | 2            | 2                 | 2          | 1          | 1          |   |
| age at enrolment                          | 40.63           | 42.98          | 33.88              | 0.0531  | 36         | 38         | 45         | 59         | 54           | 43                     | 50           | 25                 | 57         | 40         | 42         | 37         | 44         | 47           | 36           | 27           | 58           | 51                | 26         | 45         | 55         | 41         | 33                 | 32         | 23                | 49           | 38           | 25                | 34         | 50         | 19         |   |
| first manifestation                       |                 |                |                    |         | 01.11.2014 | 01.03.2014 | 01.06.2011 | 01.11.2009 | 01.01.1997   | 01.11.2008             | 01.01.1999   | 01.01.2007         | 01.07.2013 | 01.06.2006 | 01.05.2015 | 01.04.2008 | 01.06.2005 | 01.02.2010   | 01.02.2000   | 01.08.2008   | 01.05.1990   | 01.02.2000        | 01.12.2015 | 01.02.2016 | 01.06.2005 | 01.01.2009 | 01.04.2015         | 01.12.2012 | 01.07.2005        | 01.01.2006   | 01.09.2015   | 01.11.2014        | 01.05.2011 | 01.07.2005 | 01.04.2016 |   |
| first diagnosed                           |                 |                |                    |         | 01.11.2014 | 01.12.2014 | 01.06.2011 | 01.11.2011 | 01.03.2007   | 01.01.2013             | 01.09.2003   | 01.08.2009         | 01.08.2014 | 01.04.2015 | 01.06.2015 | 15.04.2008 | 15.06.2005 | 01.12.2010   | 01.10.2005   | 01.08.2009   | 01.05.1995   | 01.06.2005        | 01.04.2016 | 01.04.2016 | 01.04.2006 | 01.06.2016 | 01.10.2015         | 01.04.2015 | 01.06.2015        | 01.10.2015   | 01.10.2015   | 01.01.2016        | 01.01.2015 | 15.07.2005 | 15.04.2016 |   |
| disease duration (years)                  | 4.27            | 5.20           | 1.60               | 0.316   | 0.3        | 0.2        | 3.8        | 3.4        | 8.1          | 2.3                    | 11.7         | 5.8                | 0.9        | 0.3        | 0.2        | 7.4        | 10.2       | 4.8          | 10.3         | 6.5          | 20.8         | 10.8              | 0.1        | 0.1        | 10.1       | 0.3        | 1.0                | 0.4        | 0.2               | 0.1          | 0.2          | 0.0               | 1.0        | 10.6       | 0.2        |   |
| relapses/Za before start                  | 1.00            | 1.04           | 0.88               | 0.9102  | 0          | 2          | 0          | 0          | 0            | 0                      | 0            | 3                  | 2          | 1          | 2          | 1          | 0          | 1            | 0            | 4            | 0            | 1                 | 2          | 1          | 1          | 1          | 2                  | 1          | 1                 | 1            | 2            | 0                 | 0          | 0          | 1          |   |
| <b>Treatment</b>                          |                 |                |                    |         |            |            |            |            |              |                        |              |                    |            |            |            |            |            |              |              |              |              |                   |            |            |            |            |                    |            |                   |              |              |                   |            |            |            |   |
| treatment start                           |                 |                |                    |         | 08.02.2015 | 19.02.2015 | 18.03.2015 | 29.03.2015 | 12.04.2015   | 07.05.2015             | 01.07.2015   | 06.06.2015         | 04.07.2015 | 20.12.2015 | 25.08.2015 | 28.08.2015 | 07.09.2015 | 10.09.2015   | 22.01.2016   | 01.02.2016   | 01.03.2016   | 02.04.2016        | 20.05.2016 | 12.05.2016 | 20.05.2016 | 30.09.2016 | 15.10.2016         | 20.08.2015 | 14.08.2015        | 23.11.2015   | 22.12.2015   | 22.01.2016        | 18.01.2016 | 01.03.2016 | 25.06.2016 |   |
| previous DMT (0 = no, 1 = yes)            | 58%             | 61%            | 50%                | 0.819   | 0          | 0          | 1          | 1          | 1            | 1                      | 1            | 1                  | 0          | 0          | 1          | 1          | 1          | 1            | 1            | 1            | 1            | 1                 | 0          | 0          | 0          | 0          | 1                  | 0          | 0                 | 1            | 0            | 1                 | 1          | 1          | 0          |   |
| last medication (name)                    |                 |                |                    |         |            |            | daclizumab | fingolimod | glatiramerac | teriflunomic           | interferon b | interferon beta-1b |            |            |            | aubagio    | fingolimod | interferon b | interferon b | teriflunomic | interferon b | glatirameracetate |            |            |            |            | interferon beta-1a |            | glatirameracetate | interferon b | glatiramerac | glatirameracetate |            |            |            |   |
| date stopped                              |                 |                |                    |         | 19.02.2015 | 15.12.2014 | 31.03.2015 | 15.03.2015 | 01.01.2014   | 01.05.2013             |              |                    |            | 20.04.2015 | 26.06.2015 | 15.06.2015 | 15.05.2015 | 01.09.2015   | 05.01.2016   | 01.12.2015   | 01.02.2016   | 01.12.2015        | 15.04.2016 | 10.03.2016 |            | 30.07.2016 | 01.10.2016         | 05.01.2016 | 07.11.2015        | 21.01.2016   | 01.01.2016   | 25.02.2016        | 15.05.2016 |            |            |   |
| high-dose cortisol (date)                 |                 |                |                    |         |            |            |            |            |              |                        |              |                    |            |            |            |            |            |              |              |              |              |                   |            |            |            |            |                    |            |                   |              |              |                   |            |            |            |   |
| latency from last medication              |                 |                |                    |         |            |            | 27         | 104        | 12           | 53                     | 546          | 766                |            | 244        | 26         | 60         | 74         | 115          | 9            | 17           | 62           | 29                | 123        | 35         | 63         |            | 62                 | 14         | 46                | 16           |              | 1                 | 17         | 5          | 41         |   |
| <b>Clinical course</b>                    |                 |                |                    |         |            |            |            |            |              |                        |              |                    |            |            |            |            |            |              |              |              |              |                   |            |            |            |            |                    |            |                   |              |              |                   |            |            |            |   |
| EDSS at T1                                | 2.29            | 2.46           | 1.81               | 0.1538  | 1.0        | 2.0        | 2.0        | 3.5        | 3.0          | 2.0                    | 2.5          | 2.5                | 3.0        | 1.5        | 3.0        | 1.5        | 4.0        | 2.5          | 3.0          | 3.0          | 2.0          | 4.5               | 1.5        | 2.5        | 2.0        | 2.0        | 2.0                | 1.0        | 2.0               | 1.5          | 2.0          | 2.0               | 0.0        | 1.0        | 5.0        |   |
| EDSS at T2                                | 2.11            | 2.43           | 1.19               | 0.0026  | 1.5        | 1.5        | 2.0        | 3.5        | 3.0          | 2.0                    | 3.0          | 2.0                | 3.0        | 1.0        | 3.0        | 1.0        | 4.0        | 2.0          | 3.0          | 3.0          | 2.5          | 4.0               | 2.0        | 2.5        | 2.0        | 2.0        | 2.5                | 1.0        | 1.0               | 3.0          | 2.0          | 0.0               | 1.0        | 1.5        |            |   |
| EDSS at T3                                | 2.35            | 2.43           | 2.13               | 0.5251  | 1.0        | 1.0        | 2.0        | 4.5        | 3.0          | 2.5                    | 2.5          | 2.0                | 3.0        | 1.0        | 3.0        | 1.0        | 3.5        | 2.0          | 4.0          | 3.0          | 2.0          | 4.0               | 1.5        | 2.5        | 2.0        | 2.5        | 2.0                | 1.0        | 4.0               | 2.5          | 2.0          | 0.0               | 1.0        | 4.5        |            |   |
| relapse (0 = no, 1 = yes)                 |                 |                |                    |         | 0          | 0          | 0          | 0          | 0            | 0                      | 0            | 0                  | 0          | 0          | 0          | 0          | 0          | 0            | 0            | 0            | 0            | 0                 | 0          | 0          | 0          | 0          | 0                  | 1          | 0                 | 1            | 0            | 1                 | 0          | 0          | 0          |   |
| relapse date                              |                 |                |                    |         |            |            |            |            |              |                        |              |                    |            |            |            |            |            |              |              |              |              |                   |            |            |            |            | 04.01.2016         |            | 01.08.2016        |              | 15.11.2016   |                   |            |            |            |   |
| <b>MRI outcome</b>                        |                 |                |                    |         |            |            |            |            |              |                        |              |                    |            |            |            |            |            |              |              |              |              |                   |            |            |            |            |                    |            |                   |              |              |                   |            |            |            |   |
| signs of activity at T3 (0 = no, 1 = yes) |                 |                |                    |         | 0          | 0          | 0          | 0          | 0            | 0                      | 0            | 0                  | 0          | 0          | 0          | 0          | 0          | 0            | 0            | 0            | 0            | 0                 | 0          | 0          | 0          | 0          | 0                  | 1          | 1                 | 1            | 1            | 1                 | 1          | 1          | 1          | 1 |
| new lesions                               |                 |                |                    |         |            |            |            |            |              |                        |              |                    |            |            |            |            |            |              |              |              |              |                   |            |            |            |            | 1                  | 1          | 1                 | 3            | 16           | 3                 | 1          | 1          | 1          |   |
| Gd-enhancing lesions                      |                 |                |                    |         |            |            |            |            |              |                        |              |                    |            |            |            |            |            |              |              |              |              |                   |            |            |            |            | 1                  | 0          | 0                 | 0            | 6            | 0                 | 0          | 0          | 0          |   |
| <b>Outcome</b>                            |                 |                |                    |         |            |            |            |            |              |                        |              |                    |            |            |            |            |            |              |              |              |              |                   |            |            |            |            |                    |            |                   |              |              |                   |            |            |            |   |
| Activity (MRI+relapse)                    |                 |                |                    |         | 0          | 0          | 0          | 0          | 0            | 0                      | 0            | 0                  | 0          | 0          | 0          | 0          | 0          | 0            | 0            | 0            | 0            | 0                 | 0          | 0          | 0          | 0          | 2                  | 1          | 2                 | 1            | 2            | 1                 | 2          | 1          | 1          |   |

**Table S1. Patient characteristics discovery cohort.** All patient characteristics regarding baseline characteristics, treatment, clinical disease course, laboratory and imaging outcomes are shown for each patient.

| Isotope | Metal | Antigen       | Clone       | Supplier           |
|---------|-------|---------------|-------------|--------------------|
| 89      | Y     | BC89          | HI30        | Fluidigm           |
| 91      | Nb    | BC91          | HI30        | Biolegend          |
| 104     | Pd    | BC104         | HI30        | Biolegend          |
| 105     | Pd    | BC105         | HI30        | Biolegend          |
| 106     | Pd    | BC106         | HI30        | Biolegend          |
| 108     | Pd    | BC108         | HI30        | Biolegend          |
| 110     | Pd    | BC110         | HI30        | Biolegend          |
| 113     | In    | BC113         | HI30        | Biolegend          |
| 115     | In    | BC115         | HI30        | Biolegend          |
| 141     | Pr    | VLA4          | G034E3      | Fluidigm           |
| 142     | Nd    | CD19          | MP4-25D2    | Fluidigm           |
| 143     | Nd    | CCR2          | K036C2      | Biolegend          |
| 144     | Nd    | IL-4          | MP4-25D2    | Biolegend          |
| 145     | Nd    | CD4           | RPA-T4/OKT4 | Fluidigm/Biolegend |
| 146     | Nd    | CD8           | RPA-T8/SK1  | Fluidigm           |
| 147     | Sm    | IL-2          | NCAM16.2    | BD/Biolegend       |
| 148     | Nd    | IL-17A        | BL168       | Fluidigm           |
| 149     | Sm    | IL-3          | BVD8-3G11   | Biolegend          |
| 150     | Nd    | IL-22         | 22URTI      | Fluidigm           |
| 151     | Eu    | CD103         | Ber-ACT8    | Fluidigm           |
| 152     | Sm    | TCRgd         | 11F2        | Fluidigm           |
| 153     | Eu    | CD25          | M-A251      | Biolegend          |
| 154     | Sm    | IL-6          | MQ2-13A5    | Biolegend          |
| 155     | Gd    | IL-9          | MH9A4       | Biolegend          |
| 156     | Gd    | IL-13         | JES10-5A2   | Fluidigm           |
| 158     | Gd    | CCR4          | 205410      | Fluidigm           |
| 159     | Tb    | GM-CSF        | BVD2-21C11  | Biolegend          |
| 160     | Gd    | CD69          | FN50        | Biolegend          |
| 161     | Dy    | CD20          | 2H7         | Biolegend          |
| 162     | Dy    | CD27          | O323        | Biolegend          |
| 163     | Dy    | CD7           | M5E2/6B7    | Fluidigm           |
| 164     | Dy    | CD45R0        | UCHL1       | Fluidigm           |
| 165     | Ho    | IFN-g         | B27         | Fluidigm           |
| 166     | Er    | IL-10         | JES3-9D7    | Fluidigm           |
| 167     | Er    | CCR7          | G043H7      | Biolegend          |
| 168     | Er    | TNF           | MAb11       | Fluidigm           |
| 169     | Tm    | CD45RA        | HI100       | Fluidigm           |
| 170     | Er    | CD3           | UCHT-1      | Fluidigm           |
| 171     | Yb    | CXCR5         | 51505       | Fluidigm           |
| 172     | Yb    | IL-21         | 3A3-N2      | Fluidigm           |
| 173     | Yb    | CXCR4         | 12G5        | Biolegend/Fluidigm |
| 174     | Yb    | HLADR         | L243        | Fluidigm           |
| 175     | Lu    | Perforin/CD14 | M5E2        | Biolegend          |
| 176     | Yb    | CD56          | MQ1-17H12   | Biolegend          |
| 191     | Ir    | DNA1          |             | Fluidigm           |
| 193     | Ir    | DNA2          |             | Fluidigm           |
| 195     | Pt    | Live/Dead     |             | Sigma              |
| 181     | Ta    | BC181         | HI30        | Biolegend          |
| 209     | Bi    | CD16/CD11b    | 3G8         | Fluidigm           |

**Table S2. Mass cytometry panel (stimulation).** Antigens and clones, conjugated isotopes and metals as well as the supplier are provided for each antibody.

| Isotope | Metal | Antigen            | Clone         | Supplier           |
|---------|-------|--------------------|---------------|--------------------|
| 89      | Y     | BC89               | HI30          | Fluidigm           |
| 91      | Nb    | BC91               | HI30          | Biolegend          |
| 104     | Pd    | BC104              | HI30          | Biolegend          |
| 105     | Pd    | BC105              | HI30          | Biolegend          |
| 106     | Pd    | BC106              | HI30          | Biolegend          |
| 108     | Pd    | BC108              | HI30          | Biolegend          |
| 110     | Pd    | BC110              | HI30          | Biolegend          |
| 113     | In    | BC113              | HI30          | Biolegend          |
| 115     | In    | BC115              | HI30          | Biolegend          |
| 141     | Pr    | CCR6               | G034E3        | Fluidigm           |
| 142     | Nd    | CD19               | MP4-25D2      | Fluidigm           |
| 143     | Nd    | CCR2               | K036C2        | Biolegend          |
| 144     | Nd    | CD57/CCR5          | CD57/MP4-25D2 | Biolegend          |
| 145     | Nd    | CD4/CD4            | RPA-T4/OKT4   | Fluidigm/Biolegend |
| 146     | Nd    | CD8a               | RPA-T8/SK1    | Fluidigm           |
| 147     | Sm    | CD11c              | NCAM16.2      | BD/Biolegend       |
| 148     | Nd    | CD16               | BL168         | Fluidigm           |
| 149     | Sm    | CD25               | BVD8-3G11     | Biolegend          |
| 150     | Nd    | CD27               | 22URTI        | Fluidigm           |
| 151     | Eu    | CD38               | Ber-ACT8      | Fluidigm           |
| 152     | Sm    | TCR $\gamma\delta$ | 11F2          | Fluidigm           |
| 153     | Eu    | CD45RA             | M-A251        | Biolegend          |
| 154     | Sm    | CD3                | MQ2-13A5      | Biolegend          |
| 155     | Gd    | CD268              | 11C1          | Biolegend          |
| 156     | Gd    | CXCR3              | JES10-5A2     | Fluidigm           |
| 158     | Gd    | CCR4               | 205410        | Fluidigm           |
| 159     | Tb    | CD116              | BVD2-21C11    | Biolegend          |
| 160     | Gd    | CD69               | FN50          | Biolegend          |
| 161     | Dy    | CD20               | 2H7           | Biolegend          |
| 162     | Dy    | FOXP3              | O323          | Biolegend          |
| 163     | Dy    | CD7                | M5E2/6B7      | Fluidigm           |
| 164     | Dy    | CD45R0             | UCHL1         | Fluidigm           |
| 165     | Ho    | CD127              | B27           | Fluidigm           |
| 166     | Er    | CD86               | JES3-9D7      | Fluidigm           |
| 167     | Er    | CCR7               | G043H7        | Biolegend          |
| 168     | Er    | Ki67/CD40L         | MAb11         | Fluidigm           |
| 169     | Tm    | CD33               | HI100         | Fluidigm           |
| 170     | Er    | IgD                | UCHT-1        | Fluidigm           |
| 171     | Yb    | CD138              | 51505         | Fluidigm           |
| 172     | Yb    | IgM                | 3A3-N2        | Fluidigm           |
| 173     | Yb    | CD56/CXCR4         | 12G5          | Biolegend/Fluidigm |
| 174     | Yb    | HLADR              | L243          | Fluidigm           |
| 175     | Lu    | CD14               | M5E2          | Biolegend          |
| 176     | Yb    | CD5                | MQ1-17H12     | Biolegend          |
| 191     | Ir    | DNA1               |               | Fluidigm           |
| 193     | Ir    | DNA2               |               | Fluidigm           |
| 195     | Pt    | Live/Dead          |               | Sigma              |
| 181     | Ta    | BC181              | HI30          | Biolegend          |
| 209     | Bi    | CD11b              | 3G8           | Fluidigm           |

**Table S3. Mass cytometry panel (conventional).** Antigens and clones, conjugated isotopes and metals as well as the supplier are provided for each antibody.

| Patient ID                     | overall summary | mean responder | mean non-responder | p-value | 4031-6202    | 4031-6092    | 4031-5593  | 4031-6594  | 4031-5894   | 4031-6707  | 4031-6715  | 4031-6723         | 4031-6744  | 4031-5518  | 4031-6425  | 4031-6709  | 4031-6737  |  |
|--------------------------------|-----------------|----------------|--------------------|---------|--------------|--------------|------------|------------|-------------|------------|------------|-------------------|------------|------------|------------|------------|------------|--|
| <b>BL Characteristics</b>      |                 |                |                    |         |              |              |            |            |             |            |            |                   |            |            |            |            |            |  |
| sex (female = 1, male =2)      | 8:5             | 5:4            | 3:1                | 0.5463  | 2            | 1            | 2          | 1          | 2           | 1          | 2          | 2                 | 1          | 1          | 2          | 1          | 1          |  |
| age at enrolment               | 31.37           | 31.72          | 30.60              | 0.7696  | 28           | 36           | 48         | 27         | 31          | 30         | 27         | 31                | 29         | 25         | 45         | 23         | 29         |  |
| first manifestation            |                 |                |                    |         | 01.12.2014   | 01.01.2008   | Feb 10     | Feb 17     | Sep 12      | Mär 18     | 01.02.2018 | 13.01.2018        | 14.05.2018 | 01.10.2010 | Jan 16     | 01.01.2018 | 01.07.2018 |  |
| first diagnosed                |                 |                |                    |         | 01.11.2016   | 01.01.2014   | Mai 11     | Sep 17     | Sep 12      | Apr 18     | 18.05.2018 | 04.06.2018        | 05.07.2018 | 01.09.2011 | 23.08.2016 | 15.03.2018 | 15.07.2018 |  |
|                                |                 |                |                    |         | 704.00       | 3320.00      | 2752.00    | 273.00     | 1887.00     | 82.00      | 140.00     | 179.00            | 179.00     | 2408.00    | 627.00     | 149.00     | 45.00      |  |
| disease duration (years)       | 2.69            | 2.90           | 2.21               | 0.7382  | 1.9          | 9.1          | 7.5        | 0.7        | 5.2         | 0.2        | 0.4        | 0.5               | 0.5        | 6.6        | 1.7        | 0.4        | 0.1        |  |
| relapses/2a before start       | 0.77            | 0.67           | 1.00               | 0.3774  | 1            | 0            | 0          | 1          | 0           | 1          | 1          | 1                 | 1          | 2          | 0          | 1          | 1          |  |
| <b>Treatment</b>               |                 |                |                    |         |              |              |            |            |             |            |            |                   |            |            |            |            |            |  |
| treatment start                |                 |                |                    |         | 01.12.2016   | 01.07.2017   | 15.08.2017 | 03.11.2017 | 01.11.2017  | 23.05.2018 | 21.06.2018 | 11.07.2018        | 15.11.2018 | 01.07.2017 | 21.09.2017 | 30.05.2018 | 20.08.2018 |  |
| previous DMT (0 = no, 1 = yes) | 54%             | 56%            | 50%                | 0.8675  | 1            | 1            | 1          | 0          | 1           | 0          | 0          | 1                 | 0          | 1          | 1          | 0          | 0          |  |
| last medication (name)         |                 |                |                    |         | interferon b | interferon b | daclizumab |            | ocrelizumab |            |            | glatirameracetate |            | fingolimod | fingolimod |            |            |  |
| date stopped                   |                 |                |                    |         | 15.08.2016   | 15.08.2015   | 27.06.2017 |            | 09.04.2015  |            |            | 01.07.2018        |            | 01.11.2016 | 01.05.2017 |            |            |  |
| high-dose cortisol (date)      |                 |                |                    |         |              |              |            |            |             | 22.04.2018 | 15.02.2018 |                   | 24.08.2018 |            |            | 18.03.2018 | 24.07.2018 |  |
| latency from last medication   |                 |                |                    |         | 108          | 686          | 49         |            | 937         | 31         | 126        | 10                | 83         | 242        | 143        | 73         | 27         |  |
| <b>Clinical course</b>         |                 |                |                    |         |              |              |            |            |             |            |            |                   |            |            |            |            |            |  |
| EDSS at T1                     | 1.58            | 1.56           | 1.63               | 0.8263  | 1.0          | 2.0          | 2.0        | 1.0        | 2.0         | 1.0        | 1.0        | 2.0               | 2.0        | 2.0        | 1.0        | 1.5        | 2.0        |  |
| EDSS at T2                     | 1.69            | 1.56           | 2.00               | 0.283   | 0.0          | 1.5          | 2.5        | 1.0        | 1.5         | 2.0        | 1.5        | 2.0               | 2.0        | 2.0        | 1.5        | 2.5        | 2.0        |  |
| EDSS at T3                     | 1.73            | 1.61           | 2.00               | 0.4464  | 0.0          | 2.0          | 2.5        | 1.0        | 2.0         | 2.0        | 2.0        | 1.0               | 2.0        | 3.0        | 1.0        | 1.5        | 2.5        |  |
| relapse (0 = no, 1 = yes)      |                 |                |                    |         | 0            | 0            | 0          | 0          | 0           | 0          | 0          | 0                 | 0          | 1          | 1          | 1          | 1          |  |
| relapse date                   |                 |                |                    |         |              |              |            |            |             |            |            |                   |            | 26.09.2017 | 20.12.2017 | 07.09.2018 | 04.09.2018 |  |
| <b>MRI outcome</b>             |                 |                |                    |         |              |              |            |            |             |            |            |                   |            |            |            |            |            |  |
| signs of activity              |                 |                |                    |         | 0            | 0            | 0          | 0          | 0           | 0          | 0          | 0                 | 0          | 1          | 1          | 1          | 0          |  |
| new lesions                    |                 |                |                    |         |              |              |            |            |             |            |            |                   |            | 3          | 3          | 1          |            |  |
| Gd-enhancing lesions           |                 |                |                    |         |              |              |            |            |             |            |            |                   |            | 3          | 1          | 0          |            |  |
| <b>Outcome</b>                 |                 |                |                    |         |              |              |            |            |             |            |            |                   |            |            |            |            |            |  |
| Activity (MRI+relapse)         |                 |                |                    |         | 0            | 0            | 0          | 0          | 0           | 0          | 0          | 0                 | 0          | 2          | 2          | 2          | 1          |  |

**Table S4. Patient characteristics validation cohort.** All patient characteristics regarding baseline characteristics, treatment, clinical disease course, laboratory and imaging outcomes are shown for each patient.

| Fluorochrome      | Antigen | Clone          | Supplier    |
|-------------------|---------|----------------|-------------|
| BV510             | LD      |                | BioLegend   |
| BUV395            | CD45    | HI30           | BD          |
| BUV661            | HLADR   | G46-6          | BD          |
| BUV615            | CD45RO  | UCHL1          | BD          |
| BUV805            | CD3     | UCHT1          | BD          |
| BUV563            | CD25    | M-A251         | BioLegend   |
| PE-Cy5.5          | CD45RA  | HI100          | BioLegend   |
| PE-Cy5            | Pangd   | GL3            | Ebioscience |
| BUV496            | CD19    | 3G8            | BD          |
| BV480             | CD27    | M-T271         | BD          |
| BV421             | CCR7    | G043H7         | BioLegend   |
| BUV737            | CD39    | SJ25C1         | BD          |
| BB630             | CD103   | M290           | BD          |
| PerCP-eFluor® 710 | KLRG1   | 13F12F2        | ThermoScien |
| FITC              | CD4     | SKA3           | BD          |
| PE                | GM-CSF  | MP1-22E9 (RUO) | BD          |
| BB790-P           | CTLA4   | 2F1            | BD          |
| PE-Cy7            | IFNg    | 4S.B3          | BioLegend   |
| BV570             | CD8     | RPA-T8         | BioLegend   |
| BV711             | IL-2    | MQ1-17H12      | BioLegend   |
| BV785             | TNF-A   | MAb11          | BioLegend   |
| A647              | CXCR4   | I265           | BioLegend   |
| A700              | GZMB    | GB11           | BD          |
| APC-C7            | IL17A   | BL168          | BD          |
| PE/Dazzle™ 594    | CD56    | NCAM16.2       | BD          |
| BV650             | CXCR3   | MBSA43         | Ebioscience |
| BV605             | PD1     | EHI2.2H7       | BioLegend   |

**Table S5. Flow-cytometry panel.** Antigens and clones, fluorochromes as well as the supplier are provided for each antibody.



| patient   | sex | age at diagnosis (years) | type  | sequence of sample acquisition | untreated                     |                           |                    | dimethyl fumarate            |                             |                                         | natalizumab          |                              |                             |                                         |                      |                            |
|-----------|-----|--------------------------|-------|--------------------------------|-------------------------------|---------------------------|--------------------|------------------------------|-----------------------------|-----------------------------------------|----------------------|------------------------------|-----------------------------|-----------------------------------------|----------------------|----------------------------|
|           |     |                          |       |                                | delay from diagnosis (years)  | untreated period (months) | previous treatment | delay from diagnosis (years) | treatment duration (months) | disease activity (new lesions/relapses) | reason for cessation | delay from diagnosis (years) | treatment duration (months) | disease activity (new lesions/relapses) | reason for cessation |                            |
| patient 1 | 1   | f                        | 25    | RRMS                           | natalizumab > untreated > DMF | 9.3                       | 1.5                | natalizumab                  | 9.8                         | 6                                       | 0/0                  | NA                           | 8.0                         | 80                                      | 0/0                  | ICV-antibody test/PML-risk |
| patient 2 | 2   | f                        | 48    | RRMS                           | natalizumab > untreated > DMF | 14.0                      | 2.5                | natalizumab                  | 15.1                        | 12                                      | 0/0                  | NA                           | 10.7                        | 54                                      | 0/0                  | ICV-antibody test/PML-risk |
| patient 3 | 3   | f                        | 49    | RRMS                           | untreated > natalizumab > DMF | 0.6                       | NA                 | naive                        | 6.0                         | 7                                       | 0/0                  | NA                           | 3.6                         | 36                                      | 0/0                  | ICV-antibody test/PML-risk |
| patient 4 | 4   | f                        | 33    | RRMS                           | natalizumab > DMF > untreated | 7.5                       | 12                 | DMF                          | 6.6                         | 29                                      | 0/0                  | side effects                 | 1.6                         | 18                                      | none documented      | ICV-antibody test/PML-risk |
| mean      |     |                          | 38.43 |                                |                               | 7.83                      |                    |                              | 9.37                        | 13.50                                   |                      |                              | 5.96                        | 47.00                                   |                      |                            |

**Table S6. Patient characteristics cross-treatment cohort.** All patient characteristics regarding baseline characteristics, pre-treatments and treatment periods of untreated periods, DMF treatment and natalizumab treatment (with disease activity during the respective treatment period) are shown. (JCV = John Cunningham virus, PML = progressive multifocal leukoencephalopathy)
